# Supplementary material for: Graphene-TLL-Cu2ONPs Hybrid as Highly Efficient Catalyst for Degradation of Organic Compounds
Source: MDPI journal article supplement (doi:10.3390/nano13030449), 2023-01-21
Supplement: s1 [file s1]

## **Supplementary information**

# **Graphene-TLL-Cu<sub>2</sub>ONPs Hybrid as Highly Efficient Catalyst for Degradation of Organic Compounds**

Noelia Losada-Garcia, Jannier Carranza and Jose M. Palomo \*

Instituto de Catálisis y Petroleoquímica (ICP), CSIC, Marie Curie 2, 28049 Madrid, Spain;

\* Correspondence: josempalomo@icp.csic.es

### **Synthesis of TLL-Cu<sub>2</sub>O hybrid**

0.9 mL of commercial (18 mg of protein) *Thermomyces lanuginosus* lipase (TLL) solution was added to 60 mL 0.1M of buffer sodium phosphate pH 7 in a 250 mL glass bottle containing a small magnetic bar stirrer. Then, 600 mg of Cu<sub>2</sub>SO<sub>4</sub> x 5H<sub>2</sub>O (10 mg/ml) was added to the protein solution and it was maintained for 16 hours. After the first 30 min incubation, the solution turned cloudy (turquoise). After 16 h, 6 mL of NaBH<sub>4</sub> (300 mg) aqueous solution (1.2 M) was added to the cloudy solution (in two times of 3 mL) obtaining a final concentration of 0.12 M of sodium borohydride in the mixture. The solution turned rapidly black and, the mixture was reduced during 30 min. After the incubation, the mixture was centrifuged at 8000 rpm for 5 min, (10 mL per falcon type tube). The generated pellet was re-suspended in 15 mL of water. It was centrifuged again at 8000 r.p.m for 5 min and the supernatant removed. The process was repeated twice more. Finally, the supernatant was removed and the pellet of each falcon was re-suspended in 2 mL of water, collected all solutions in a round-bottom flask, frozen with liquid nitrogen and lyophilized for 16 hours. After that, 150 mg of the so called **TLL-Cu<sub>2</sub>O hybrid** was obtained.

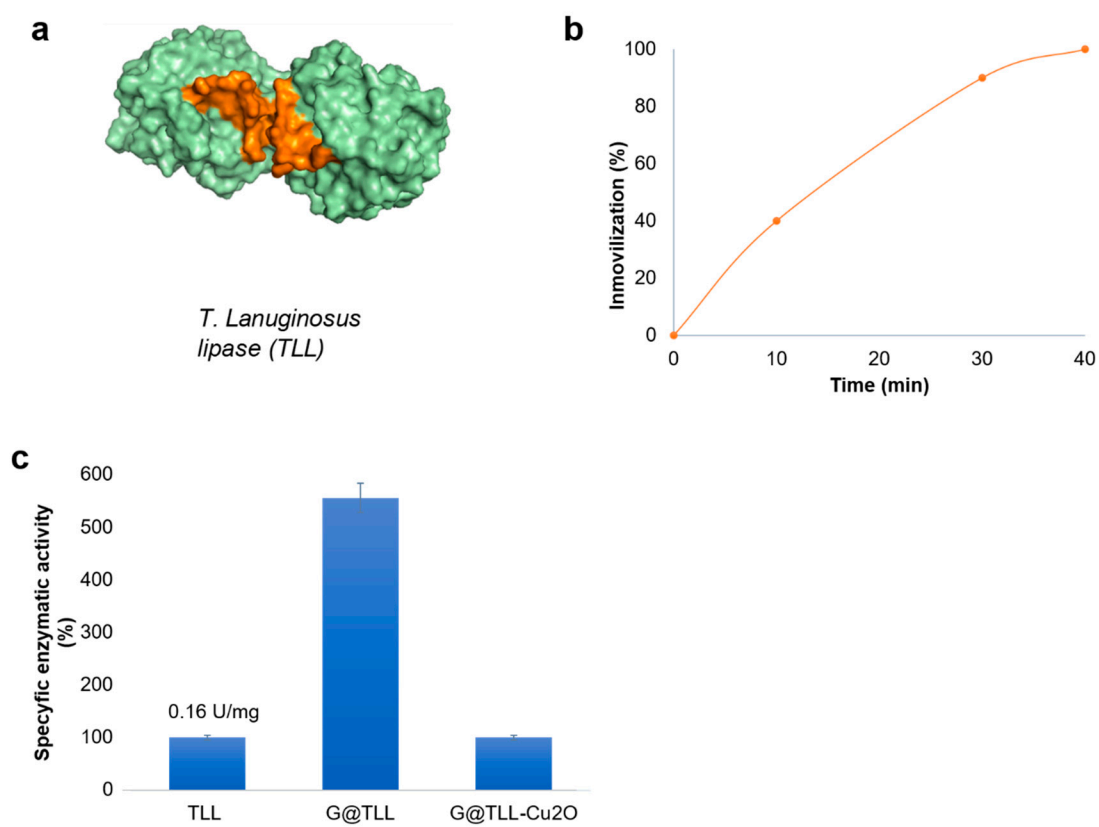

**Figure S1. A)** Three-dimensional Surface of dimer from TLL; **B)** Immobilization curve of G@TLL; **C)** Enzymatic activity.

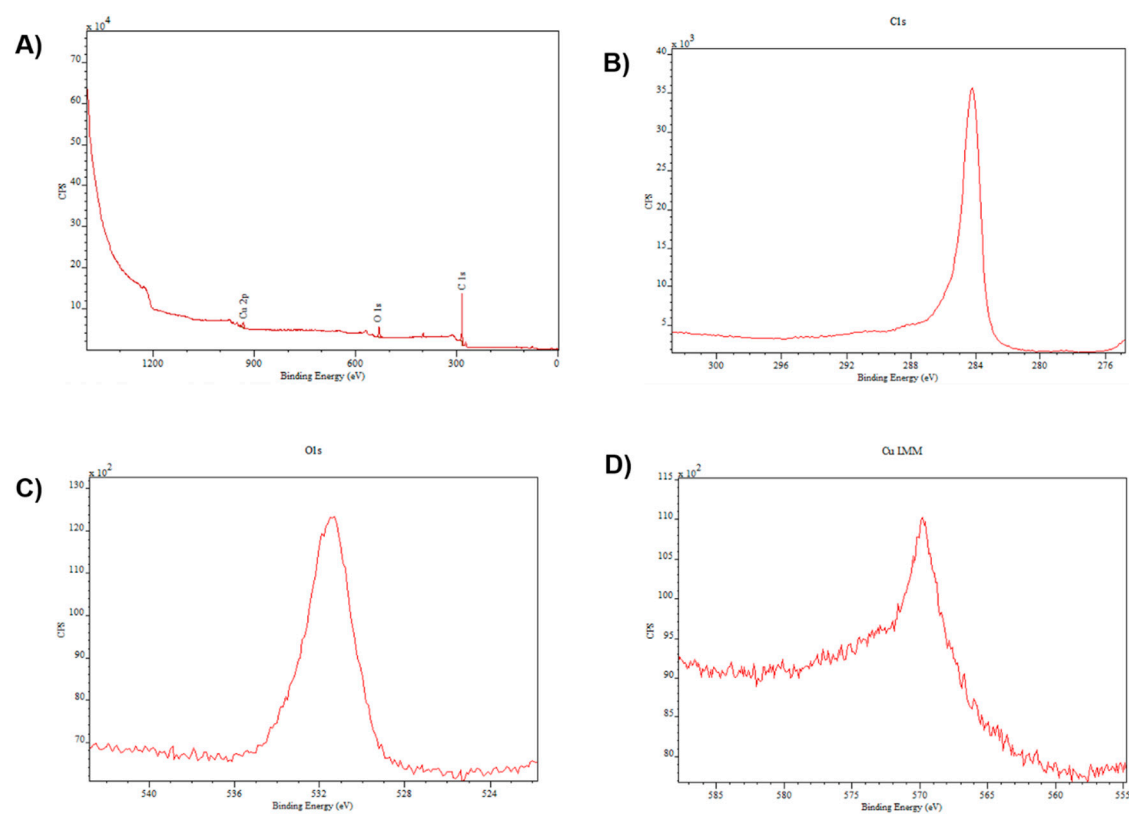

**Figure S2.** XPS analysis of G@TLL-Cu<sub>2</sub>O hybrid. **A)** XPS full spectrum. **B)** XPS spectrum of C1s, **C)** XPS spectrum of O1s. **D)** Cu LMM auger spectrum.

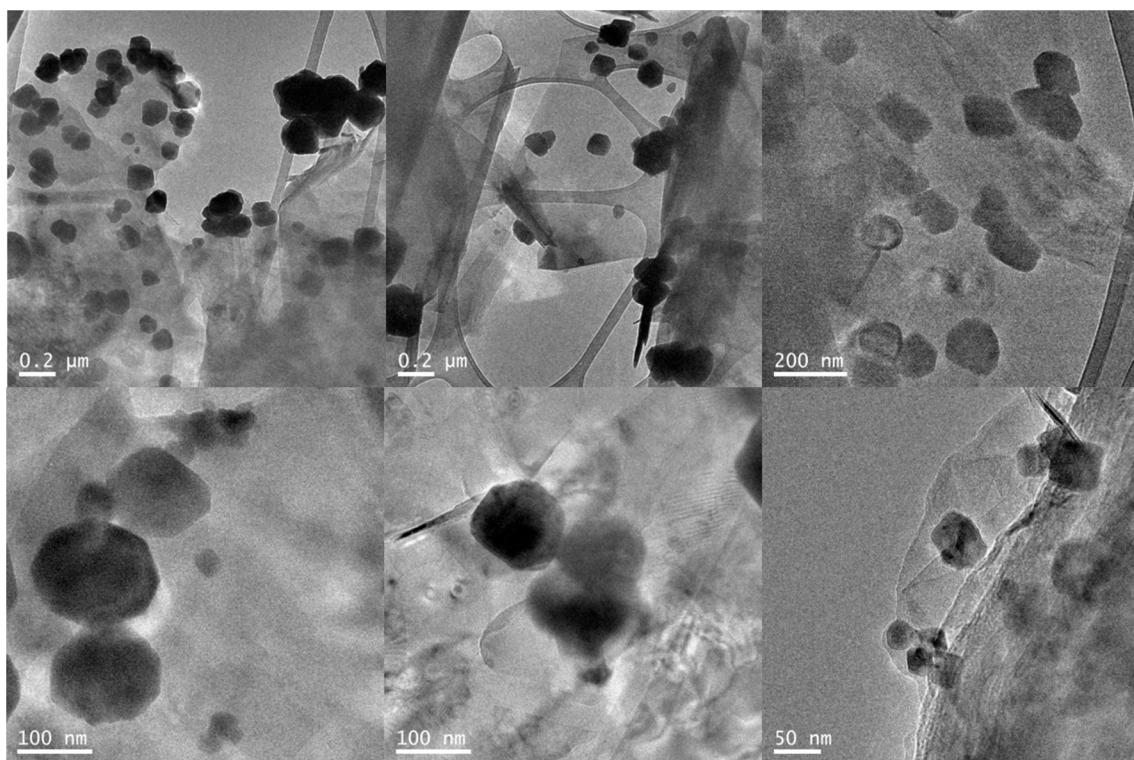

**Figure S3.** TEM images of G@TLL-Cu<sub>2</sub>O hybrid.

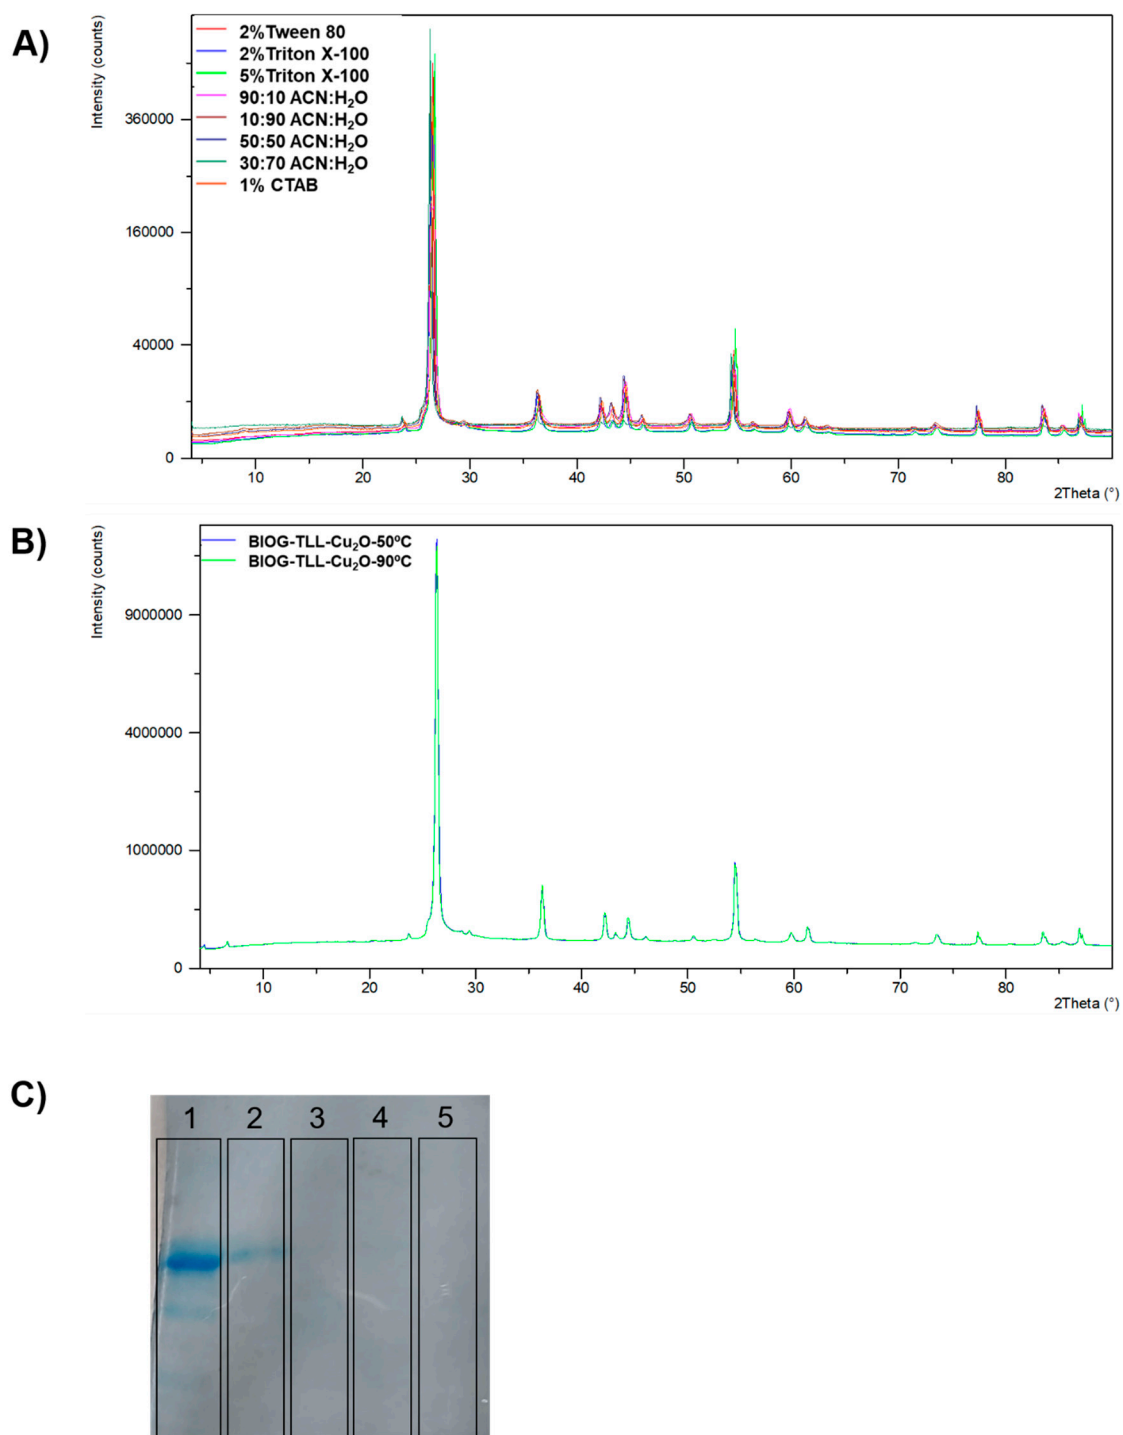

**Figure S4.** **A)** XRD spectra of the **G@TLL-Cu<sub>2</sub>O** hybrid incubated in different solvents and detergents; **B)** XRD spectra for **G@TLL-Cu<sub>2</sub>O** hybrid in SDS at 50 and 90 °C; **C)** 1-TLL, 2- G@TLL, 3- G@TLL-Cu<sub>2</sub>O pre-treated with SDS at 90°C, 4- G@TLL-Cu<sub>2</sub>O pre-treated with SDS at 50°C, 5- G@TLL-Cu<sub>2</sub>O.

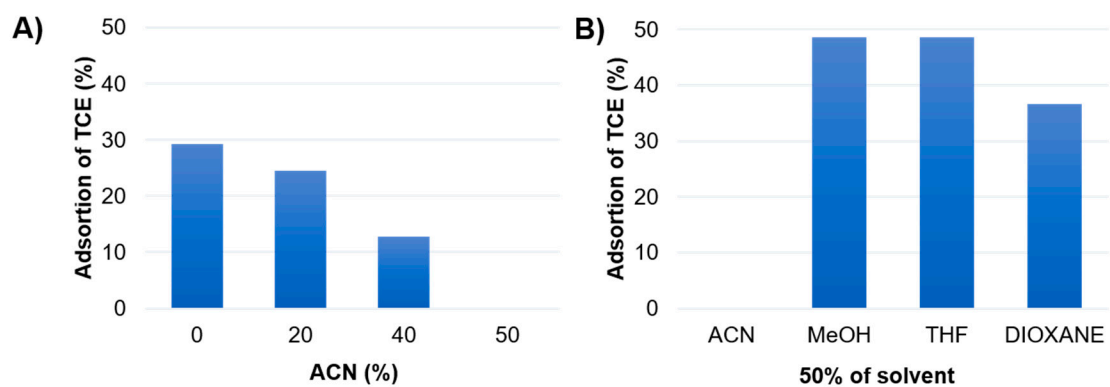

**Figure S5.** Study of adsorption of TCE to G@TLL in 1min. **A)** Different concentrations of ACN; **B)** Different solvents at 50:50 with water.

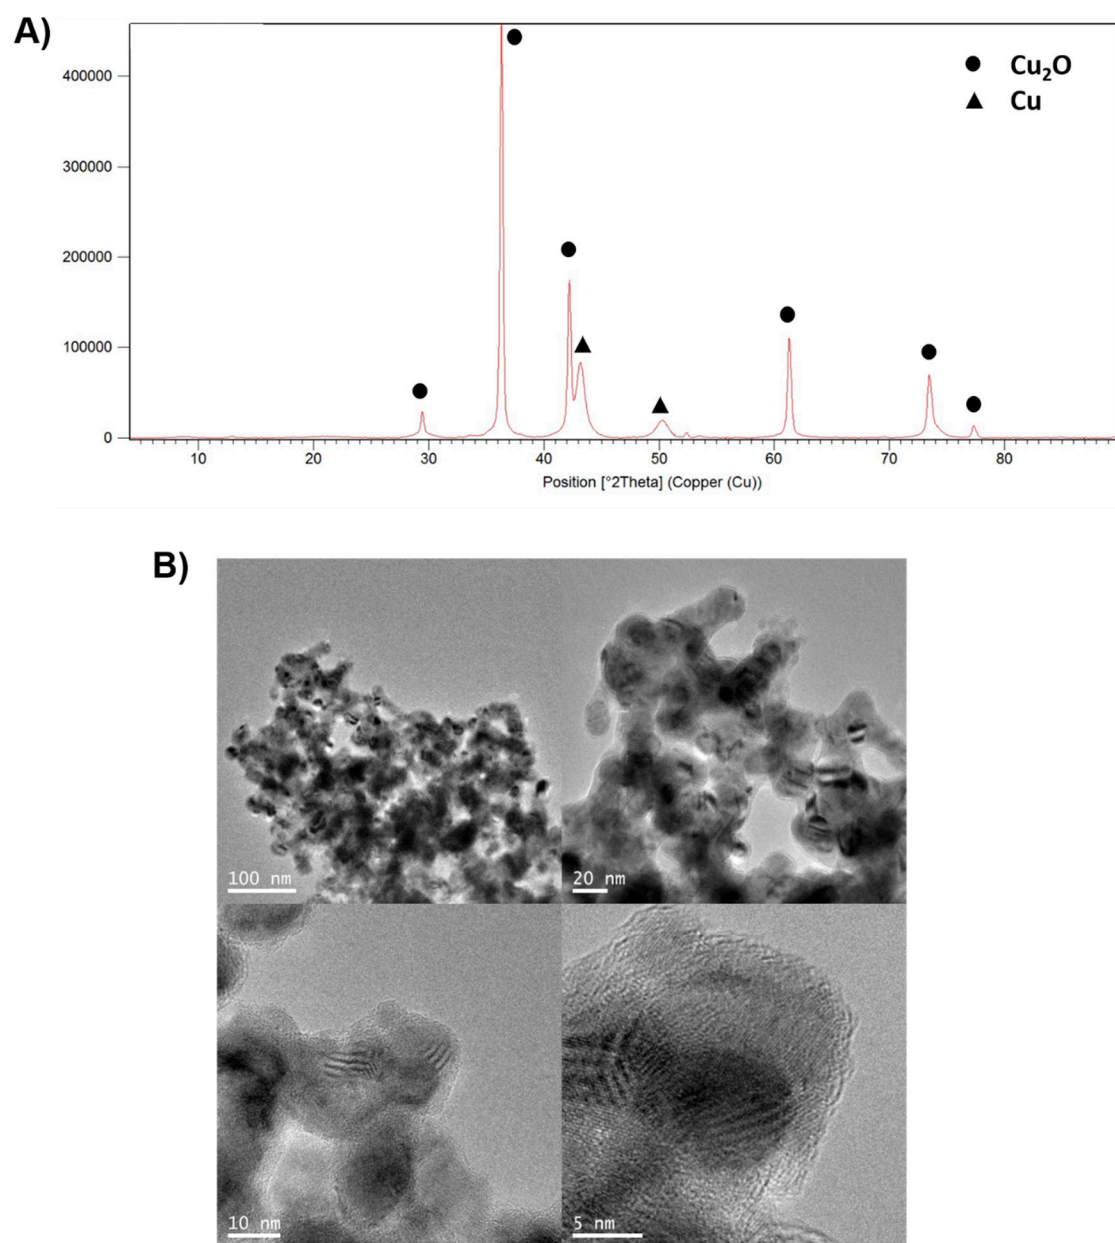

**Figure S6.** Characterization of TLL- $\text{Cu}_2\text{O}$  hybrid: **A)** XRD spectrum; **B)** TEM and HR-TEM images.



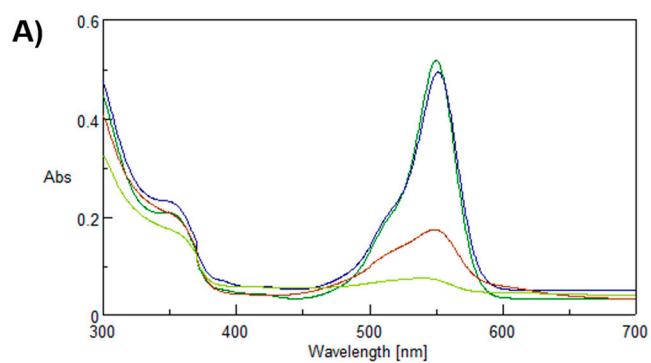

| Time (min) | Absorbance | Degradation (%) |
|------------|------------|-----------------|
| 0          | 0.51       | 0               |
| 10         | 0.49       | 4.5             |
| 30         | 0.18       | 66.4            |
| 40         | 0.005      | >99             |

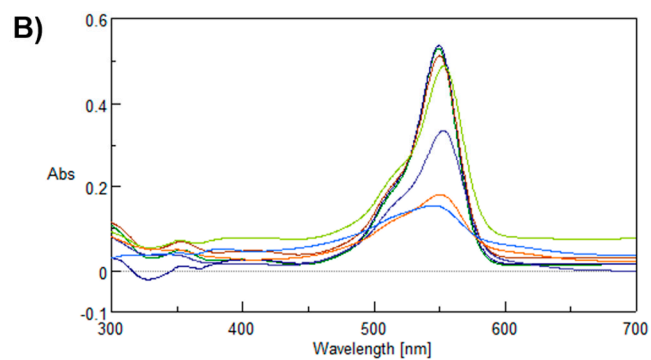

| Time (min) | Absorbance | Degradation (%) |
|------------|------------|-----------------|
| 0          | 0.53       | 0               |
| 10         | 0.53       | 0               |
| 20         | 0.52       | 1.5             |
| 30         | 0.48       | 8               |
| 40         | 0.33       | 38              |
| 50         | 0.2        | 62              |
| 60         | 0.15       | 71              |

**Figure S7.** Effect of the amount of  $\text{H}_2\text{O}_2$  with 5mg of  $\text{G@TLL-Cu}_2\text{O}$  hybrid and 0.1mM of RhB: **A)** 250mM; **B)** 200mM (inset table of data).

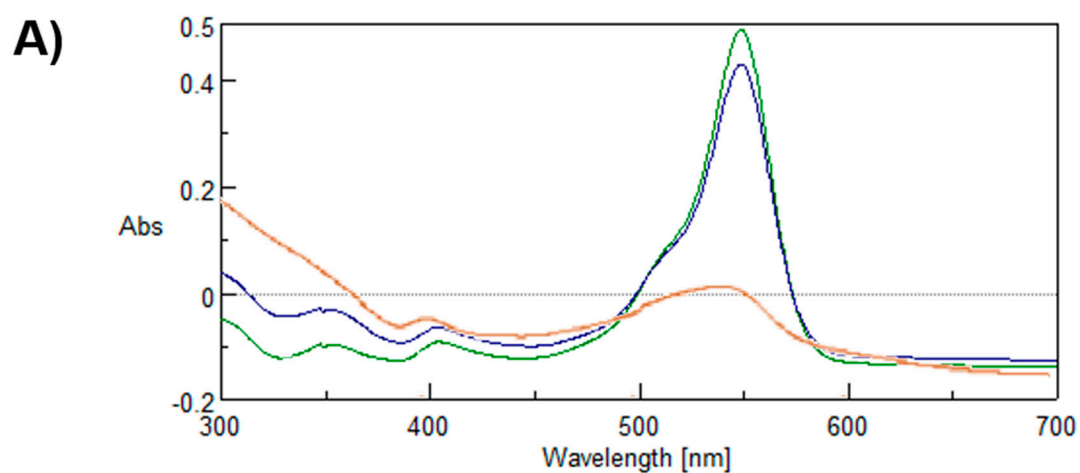

**B)**

| Time (min) | Absorbance | Degradation (%) |
|------------|------------|-----------------|
| 0          | 0.47       | 0               |
| 5          | 0.42       | 10              |
| 25         | 0.008      | 99              |

**Figure S8. A)** Spectra of degradation of 10mg of **G@TLL-Cu<sub>2</sub>O** hybrid with 250mM of H<sub>2</sub>O<sub>2</sub> and 0.1mM of RhB; **B)** Table of data.

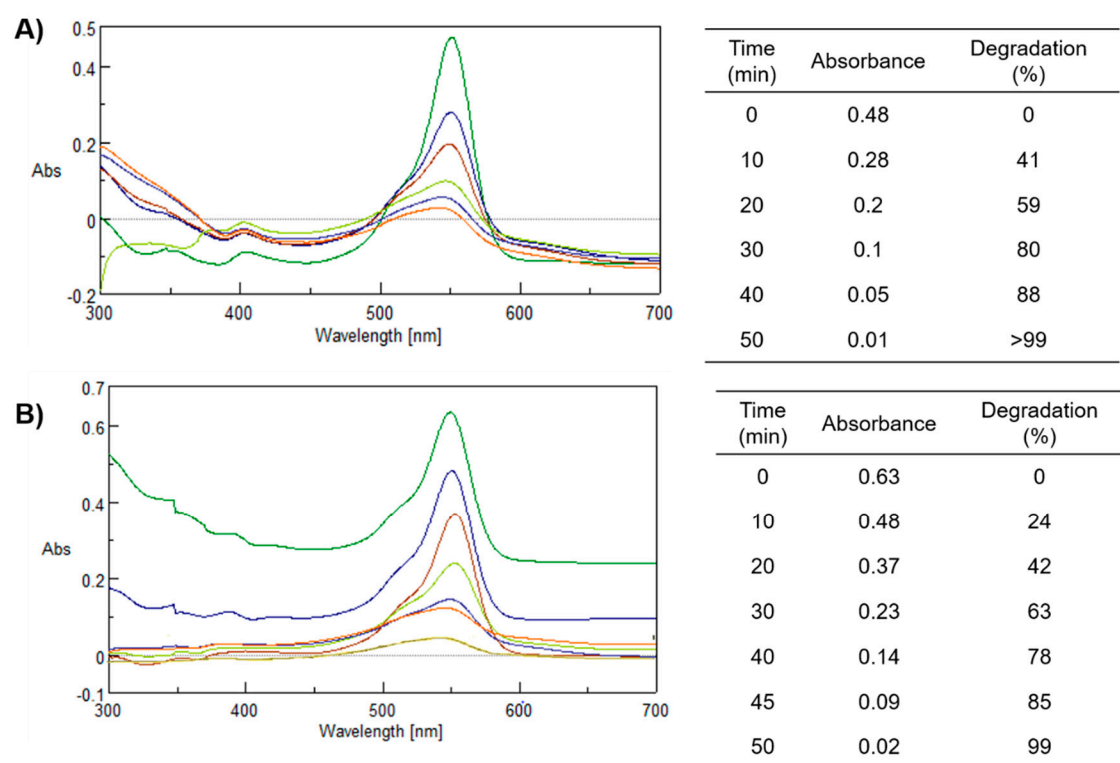

**Figure S9.** Effect of medium pH in the degradation of 0.1mM of RhB, conditions: 50:50 ACN:Buffer with 5mg of **G@TLL-Cu<sub>2</sub>O** hybrid and 250mM of H<sub>2</sub>O<sub>2</sub>: **A)** Buffer sodium acetate pH4; **B)** Distilled water (inset table of data).

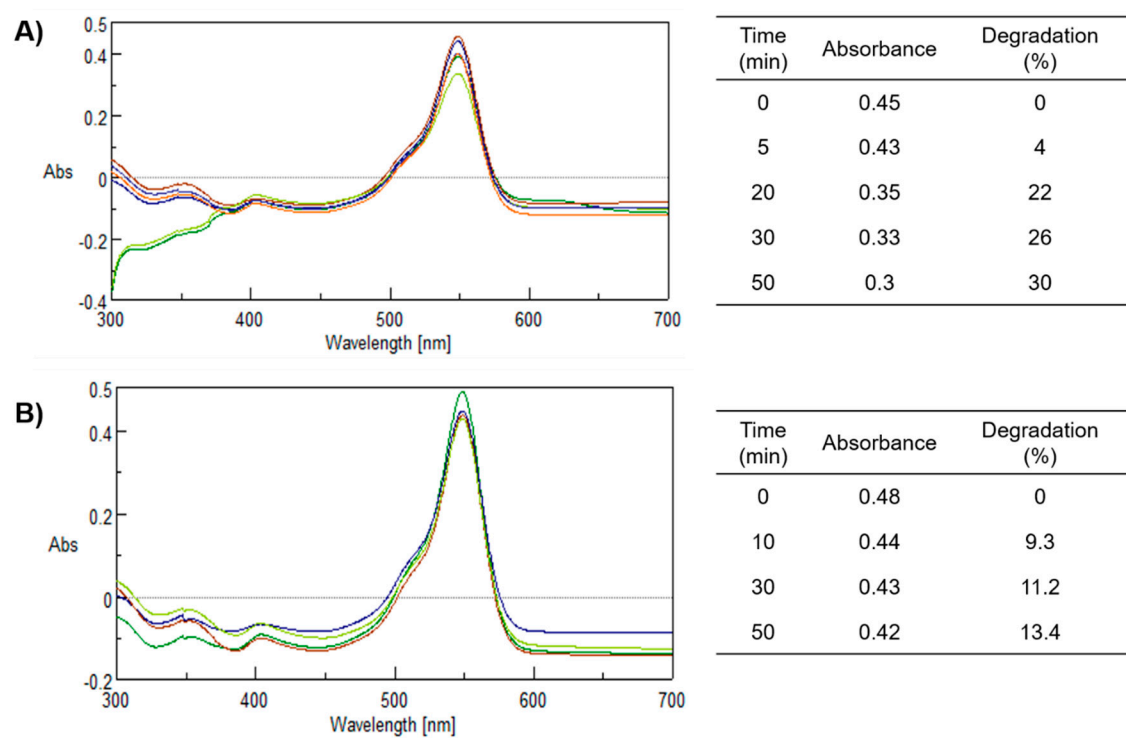

**Figure S10.** Effect of medium pH in the degradation of 0.1mM of RhB, conditions: 50:50 ACN:Buffer with 5mg of **G@TLL-Cu<sub>2</sub>O** hybrid and 250mM of H<sub>2</sub>O<sub>2</sub>: **A)** Buffer sodium phosphate pH7; **B)** Buffer sodium bicarbonate pH8.5.
